# Supplementary material for: Impact of COVID-19 Pandemic on Patients with ST-Segment-Elevation Myocardial Infarction Complicated by Out-of-Hospital Cardiac Arrest
Source: MDPI journal article supplement (doi:10.3390/ijerph20010337), 2022-12-26
Supplement: s1 [file s1]

**Supplementary Table S1.** Baseline characteristics before propensity score matching.

| Variable                              | Before COVID-19<br>(n = 4671) | During COVID-19<br>(n = 740) | p-value |
|---------------------------------------|-------------------------------|------------------------------|---------|
| Male gender                           | 3300 (70.6%)                  | 525 (70.9%)                  | 0.9     |
| Age [years]                           | 64.7 (±12.2)                  | 64.3 (±12.2)                 | 0.5     |
| Diabetes mellitus                     | 747 (16%)                     | 132 (17.8%)                  | 0.02    |
| Previous stroke                       | 210 (4.5%)                    | 29 (3.9%)                    | 0.5     |
| Previous MI                           | 679 (14.5%)                   | 96 (13%)                     | 0.03    |
| Previous CABG                         | 82 (1.8%)                     | 14 (1.9%)                    | 0.8     |
| Previous PCI                          | 559 (12%)                     | 87 (11.8%)                   | 0.8     |
| Smoking                               | 1202 (25.7%)                  | 220 (29.7%)                  | 0.02    |
| Arterial hypertension                 | 2416 (51.7%)                  | 385 (52.0%)                  | 0.9     |
| Chronic kidney disease                | 218 (4.7%)                    | 32 (4.3%)                    | 0.8     |
| Chronic obstructive pulmonary disease | 80 (1.7%)                     | 19 (2.6%)                    | 0.1     |
| Killip-Kimball Class                  |                               |                              |         |
| I                                     | 2187 (46.8%)                  | 304 (41.1%)                  | 0.008   |
| II                                    | 693 (14.8%)                   | 134 (18.1%)                  | 0.008   |
| III                                   | 434 (9.3%)                    | 63 (8.5%)                    | 0.008   |
| IV                                    | 1357 (29.1%)                  | 239 (32.3%)                  | 0.008   |
| Direct transport                      | 1640 (35.1%)                  | 297 (40.1%)                  | 0.009   |

Data are presented as number (percentage) or mean and standard deviation. CABG - coronary artery bypass grafting; MI - myocardial infarction; PCI - percutaneous coronary intervention.

**Supplementary Table S2.** Angiographic characteristics before propensity score matching

| Variable                         | Before COVID-19<br>(n = 4671) | During COVID-19<br>(n = 740) | p-value |
|----------------------------------|-------------------------------|------------------------------|---------|
| Single-vessel disease            | 1894 (40.5%)                  | 317 (42.8%)                  | 0.1     |
| LMCA only                        | 46 (1.0)                      | 5 (0.7)                      | 0.5     |
| Multivessel disease without LMCA | 2228 (47.7)                   | 345 (46.6)                   | 0.5     |
| Multivessel disease with LMCA    | 503 (10.8)                    | 73 (9.9)                     | 0.8     |
| TIMI 0 or 1 flow before PCI      | 3673 (78.6)                   | 590 (79.7)                   | 0.5     |
| TIMI 3 flow after PCI            | 4020 (86.1)                   | 626 (84.6)                   | 0.1     |

Data are presented as number (percentage). LMCA - left main coronary artery; PCI - percutaneous coronary intervention; TIMI - thrombolysis in myocardial infarction

**Supplementary Table S3.** Percutaneous coronary intervention details before propensity match score

| Variable                                                            | Before COVID-19<br>(n = 4671) | During COVID-19<br>(n = 740) | p-value |
|---------------------------------------------------------------------|-------------------------------|------------------------------|---------|
| Site volume $\geq 400$ PCI in current year                          | 4340 (92.9)                   | 692 (93.5)                   | 0.6     |
| Radial approach during angiography                                  | 2012 (43.1%)                  | 436 (58.9%)                  | 0.001   |
| Radial approach during PCI                                          | 1989 (42.6%)                  | 428 (57.8%)                  | 0.001   |
| PCI operator annual volume (PCI during 2014-2021)                   | 180.3 ( $\pm 113.9$ )         | 170.7 ( $\pm 103.6$ )        | 0.03    |
| PCI operator radial experience (2014-2021) [% of all performed PCI] | 78.0 ( $\pm 19.1$ )           | 82.6 ( $\pm 13.7$ )          | 0.001   |
| Total amount of contrast, [ml]                                      | 174 ( $\pm 75$ )              | 158 ( $\pm 66$ )             | 0.001   |
| Total radiation dose, [mGy]                                         | 1040 ( $\pm 1020$ )           | 740 ( $\pm 740$ )            | 0.001   |
| Aspiration thrombectomy during PCI                                  | 779 (16.7%)                   | 107 (14.5%)                  | 0.04    |
| Rotablation during PCI                                              | 4 (0.1)                       | 5 (0.7)                      | 0.01    |
| P2Y12 inhibitors before and during PCI                              |                               |                              |         |
| Clopidogrel                                                         | 3514 (75.2%)                  | 459 (62%)                    | 0.001   |
| Ticagrelor                                                          | 1112 (23.8%)                  | 270 (36.5%)                  | 0.001   |
| Prasugrel                                                           | 45 (1.0%)                     | 11 (1.5%)                    | 0.001   |
| GPI IIb/IIIa during PCI                                             | 1257 (26.9)                   | 237 (32.0)                   | 0.001   |
| Unfractionated heparin during PCI                                   | 3925 (84.0)                   | 630 (85.1)                   | 0.7     |

|                                          |           |         |      |
|------------------------------------------|-----------|---------|------|
| Low-molecular-weight heparins during PCI | 122 (2.6) | 8 (1.1) | 0.02 |
| Bivalirudin during PCI                   | 17 (0.4)  | 7 (0.9) | 0.05 |

Data are presented as number (percentage) or mean and standard deviation. PCI - percutaneous coronary intervention

**Supplementary Table S4.** Treatment delays before propensity score matching.

| Variable                                                       | Before COVID-19<br>(n = 4671) | During COVID-19<br>(n = 740) | p-value |
|----------------------------------------------------------------|-------------------------------|------------------------------|---------|
| Time from pain to first medical contact, minutes               | 122.1 (±180.8)                | 126.5 (±197.5)               | 0.5     |
| Time from pain to angiography, minutes                         | 230.4 (±218.5)                | 227.9 (±231.4)               | 0.8     |
| Time from first medical contact to angiography, minutes        | 108.2 (±116.4)                | 101.4 (±109.8)               | 0.1     |
| Time from first medical contact to angiography <90 minutes, %  | 2108 (45.1%)                  | 283 (38.2%)                  | 0.001   |
| Time from first medical contact to angiography <120 minutes, % | 1289 (27.6%)                  | 168 (22.7%)                  | 0.006   |

Data are presented as number (percentage) or mean and standard deviation

**Supplementary Table S5.** Periprocedural complications before propensity score matching.

| Variable                             | Before COVID-19 | During COVID-19 | P-value |
|--------------------------------------|-----------------|-----------------|---------|
|                                      | (n = 4671)      | (n = 740)       |         |
| Dissection of coronary artery        | 9 (0.2%)        | 1 (0.1%)        | 0.9     |
| Coronary artery perforation          | 13 (0.3%)       | 1 (0.1%)        | 0.7     |
| No-reflow                            | 139 (3.0%)      | 19 (2.6%)       | 0.6     |
| Periprocedural stroke                | 0               | 0               | -       |
| Bleeding at the puncture site        | 14 (0.3%)       | 2 (0.3%)        | 0.9     |
| Allergic reaction                    | 3 (0.05%)       | 0 (0%)          | 0.1     |
| Cardiac arrest                       | 358 (7.7%)      | 47 (6.4%)       | 0.2     |
| Periprocedural death                 | 313 (6.7%)      | 32 (4.3%)       | 0.02    |
| Periprocedural myocardial infarction | 1 (0.01%)       | 0 (0%)          | 0.9     |
| Any complication                     | 663 (14.2%)     | 82 (11.1%)      | 0.03    |
| Any complication or death            | 559 (12.0%)     | 73 (9.9%)       | 0.1     |

Data are presented as number (percentage).
